# Supplementary material for: In vitro evaluation of disposable transport ventilators with combination aerosol therapy
Source: HighWire-hosted journal article supplement (doi:10.1136/bmjresp-2020-000739), 2021-03-01
Supplement: bmjresp-2020-000739supp001_data_supplement.pdf [file bmjresp-2020-000739supp001_data_supplement.pdf]

## SUPPLEMENTARY MATERIAL

**Table 2:** Aerosol delivery from DTVs. Data shows the effects of the nebuliser type, nebuliser location within the respiratory circuit and the effects of passive humidification on the potential lung dose in a simulated intubated adult patient type. P-values are included in the table to highlight whether there was a statistically significant difference in the dose, with p-values  $\leq 0.05$  considered significant.

| Patient Type | Nebuliser | Position | HME           | Lung dose range (%) | P-Value |
|--------------|-----------|----------|---------------|---------------------|---------|
| Adult        | VMN       | Proximal | N             | 25.19 – 34.15       | 0.000   |
|              |           | Distal   |               | 19.22 – 26.03       |         |
|              |           | Proximal | Y             | 32.37 – 40.43       | 0.000   |
|              |           | Distal   |               | 23.63 – 31.63       |         |
|              | Proximal  | Y        | 32.37 – 40.43 | 0.000               |         |
|              |           | N        | 25.19 – 34.15 |                     |         |
|              | JN        | Proximal | N             | 3.14 – 8.92         | 0.021   |
|              |           |          |               | Distal              |         |
|              |           | Proximal | Y             | 5.60 – 9.91         | 0.000   |
|              |           |          |               | Distal              |         |
| Proximal     |           | Y        | 5.60 – 9.91   | 0.002               |         |
|              |           | N        | 3.14 – 8.92   |                     |         |

**Table 3:** Aerosol delivery from DTVs. Data shows the effects of the nebuliser type, nebuliser location within the respiratory circuit and the effects of passive humidification on the potential lung dose in a simulated intubated paediatric patient type. P-values are included in the table to highlight whether there was a statistically significant difference in the dose, with p-values  $\leq 0.05$  considered significant.

| Patient Type | Nebuliser | Position | HME          | Lung dose range (%) | P-Value |
|--------------|-----------|----------|--------------|---------------------|---------|
| Paediatric   | VMN       | Proximal | N            | 8.12 – 10.89        | 0.001   |
|              |           | Distal   |              | 5.23 – 7.34         |         |
|              |           | Proximal | Y            | 8.18 – 11.02        | 0.008   |
|              |           | Distal   |              | 8.06 – 10.46        |         |
|              | Proximal  | Y        | 8.18 – 11.02 | 0.498               |         |
|              |           | N        | 8.12 – 10.89 |                     |         |
|              | JN        | Proximal | N            | 2.15 – 3.82         | 0.000   |
|              |           |          |              | Distal              |         |
|              |           | Proximal | Y            | 2.34 – 4.00         | 0.000   |
|              |           |          |              | Distal              |         |
| Proximal     |           | Y        | 2.34 – 4.00  | 0.226               |         |
|              |           | N        | 2.15 – 3.82  |                     |         |
